# Supplementary material for: Oakleaf: an S locus‐linked mutation of Primula vulgaris that affects leaf and flower development
Source: PubMed Central journal article supplement (PMC4973830; doi:10.1111/nph.13370), 2015-04-09
Supplement: NPH-208-149-s001.pdf [file NPH-208-149-s001.pdf]

**New *Phytologist* Supporting Information Figs S1 & S2 and Tables S1–S3**

Article title: *Oakleaf*: an S locus-linked mutation of *Primula vulgaris* that affects leaf and flower development

Authors: Jonathan M. Cocker, Margaret A. Webster, Jinhong Li, Jon Wright, Gemy Kaithakottil, David Swarbreck and Philip M. Gilmartin

Article acceptance date: 07 February 2015

The following Supporting Information is available for this article:

**Fig. S1** Predicted amino acid sequences of PvKNOX proteins.

**Fig. S2** Multiple sequence alignment of PvKNOX proteins.

**Table S1** RNA Seq read data from six paired-end read libraries

**Table S2** Differential gene expression of *PvKNOX* genes

**Table S3** Analysis of single nucleotide polymorphisms in *PvKNL* genes

**Table S4** Genes upregulated in *Primula vulgaris* *Oakleaf* as compared with wild type (separate Excel file)

**Table S5** Genes downregulated in *Primula vulgaris* *Oakleaf* as compared with wild type (separate Excel file)

### AtKNAT1

MEEYQHDNSTTPQRVSFLYSPISSSNKNNDNTSDTNNNNNNNNNSNYGPGYNNTNNNNHHHQMHLFPHMSSLLPQTTENCFRSDHD  
QPNNNNNPSVKSEASSRINHYSMLMRAIHNTQEANNNDNDVSDVEAMKAKIIAHPHYSTLLQAYLDCQKIGAPPDVVDRITAA  
RQDFEARQQRSTPSVSASSRDPQLDQFMEAYCDMLVKYREELTRPIQEAMEFIRRIEQLSMLCQSPIHILNNDGKSDNMGSSD  
EEQENNSGGETELPEIDPRAEDRELKHNLLKKYSGYLSSLKQELSKKKKKGKLPKEARQKLLTWELHYKWPYPSESEKVALAES  
TGLDQKQINNWFINQRKRHWKPSSEDMQFMVMDGLQHPHHAALYMDGHYMGDGPYRLGP

### PvKNL1

MEDYNENTSSQSGNFLYGGSLLATNNNTTSTNTTSSLYGRNSSHQSHMMNMMNMMNMSMNINSFHLGGEYPIVKSEAGGSGTSQN  
FIFPNSVIRGIQTGLSNESCSNNDVESIKAKIISHPQYSNLLLEAYMDCQKVGAPPEVAAQLTAVREEFEGQRASTIGKNATKDP  
ELDQFMEAYYNMLVKYREELTRPIQEAMDFMRRVEAQLNILLNNNNNSTAPVRIFNSEEKCEGVVSSEEDQENSGGETELAEIDPR  
AEDQELKNYLLRKYSGYLGLSKQELSKKKKKGKLPKDARQKLLSWWELHYKWPYPSESEKVALAESTGLDQKQINNWFINQRKRH  
WKPSSEDMQFMVMDGIHPQSASLYMDGHYMGEGPYRLGP

### PvKNL2

MDDIYRQVYMSPDNLMPVDYQALYSSSSASVASGGDHQSRFPFYGSDELISISDQALIRRSTNIHEDDDVLKRKIIASHPWYPKL  
LDAYIGCQKVGAPPEISCLLEEIQRENDVLNHAASSCLGEDPELDEFMNTFCEILLKYKSDLKPLEEATTFLNKIELQFGNLC  
KDEGPVSSDDDLGGGEVEGLDNRITQSEEDLKDRLLRKFGSHISNLKLEFSKKKKKGKLPKEGRQTLLEWNNLHYKWPYPTEGDK  
ISLAETTGLDQKQINNWFINQRKRHWKPSSEDMQFMVMDGLQHPHHAALYMDGHYMGEGPYRLGP

### PvKNL6

MDELYRLHSSISSDDLTINRLNGNIQFDTIIVREMSDLKQAIIASHPLYPNLVSAYIECRKVGAPPEMALLLDEISKENIPIST  
CGEIGVDPEDDFMGTYCAVLQRYKEDLSKPFNEATTFLLTSIESQLHDLCKDTIITPTTTSLASDDMAGSSEEMSCGEVEAVES  
QESSVPRKGDKELKEMLLRKYSGYLSSLRDKDFLKKRKKGKLPNDARTALLDWWNTHYRWYPTEEEKVKLSEVTGLDQKQINNWF  
INQRKRHWKPSSEDMRFALMEGVSGNSNTGSSMYVDHGDGTGSNLVKGQLPRFI

### PvSTL1

MSLMNFGENLNSGGANEMMILPNSSSSNNNTLFFQQNHNNFNTSNQNNITPFLLENYNNNQLNVYSTDHQGASSLRAKIIAHPHY  
HRLLAAYVNCQKIGAPPEVVAGLEEAAYSVAVRGRVDSRVGEDPGLDQFMEAYCEMLTKYEQLSKPFKEAMLFLSKIESQFKA  
LALPSSSDSGFDGYGSSEEEAEFIHNTVDPQAEENELKQQLLRKYSGYLGLSKQEFMKKRKKGKLPKEARNQLEWWSRNYKWPYP  
SESQKMALAESTGLDSKQINNWFINQRKRHWKPSSEDMQFVMDSNSHPHNSAAAHYMDHVLANPFPMDTSPSFI

### PvSTL2

MYANNSSCSMAFGEHLNSGGIYPMMTMPNSSPSNNNTLFFENNHTSENQTSFFMENNQNINSNDDHGGSTSSASSISLRAKIMAH  
HYHRLLAAYVNCQKIGAPQEVVARLEEAQVMIGRVPVGGVGGDDPGLDQFMEAYCEMLNKYEQLSKPFKEAMLFLSKFESQFRA  
LTLSSSTGHSFERNSSSEEEADTDYSIVDRQEDKDLKGRLLRKYSGYLGLSKQEFMKKKKKGKLPKEARENLLEWWSRNNHWPY  
PSESQKMELEAESTGLDPKQINNWFINQRKRHWKPTDEMDFVMDPNPNAAAHYMDHVMVNPFPMDI

### PvKNL3

MDMQEMAGLHQHYSDQQLSDTSSVLRISITVDGSTDDQQNPHHQQQGGPTWLNSAILQTNFLNLQTNSESPTRPHHHQGHNNNSN  
AGQWTPRSMDTNNNNNNNNNNNNNNNNNNNEVVEDPGGMSWQTARHKAELIAHPLYEQLLSAHVACLRIATPVDQLPRIDAQL  
AQSQQVAKYSGMAHGGISMGDDKELDQFMTHYVLLLCFSFKEQLQQHVRVHAMEAVMACWELEQSLQSLTGVSPGEGTGATMSDD  
EEDQLESDNNLFDGSLDGHSTGFGPLVPTEESERSLMERVRQELKHELKQGYKEKIVDIREEILRKRKAGKLPDGTTSVLKAWWQ  
SHSKWPYPTEEDKARLVQEPGLELQKQINNWFINQRKRHWKPSSEDMQFVMDPNPNAAAHYMDHVMVNPFPMDI

### PvKNL4

MAFHHTQELPLHHFSDSSGGPPPTWLNSEILRQNHYGGTGGRSFLQTIINNNTNNNNSENDEFSSRSESDGSGEEREWQTAKCK  
SDILSHPLYEQLLSAHVQCLRIATPVDQLPRIDAQLAQSQQVAKYVGLGHGNPPLDDKDLQFMTHYVLLLSFKEQLQQHVRV  
HAMEAVMACWELEQSLQSLTGVAPGEGTGATMSDDDEDQADSDTNIYDGLDGTDMGMFPTESERSLMARVRQELKLELQGY  
KEKIVDIREEILRKRKAGKLPDGTTSHLKAWWQSHSKWPYPTEEDKARLVQETGLQKQINNWFINQRKRHWKPSSEDMQFVMDPNPNA  
AAHYMDHVMVNPFPMDI

### PvKNL7

MQEQQGNMGMGGGDHFGSDVGGGEMKAEIAAHPLCEQLLAHVACLRVATPIDQLPMIEAQLAQAQGIIVRAYAASVQGNRPLSP  
HERQELDNFLGQYIMVLSFKDQLQQHVRVHAMEAVMACREIEHNLQALTGVTLGEGSGATMSDDEADDTNNIMQQMDFSMHQ  
SAEGHDMGMGFPPLPTEESERSLMERVRQELKIELKQGFRRSRIEDVREEILRKRKAGKLPDGTTSVLKNWWQLHAKWPYPTEEDKA  
KLVEETGLQKQINNWFINQRKRHWKPSSEDMQFVMDPNPNAAAHYMDHVMVNPFPMDI

**Fig. S1** Predicted amino acid sequences of PvKNOX proteins. Amino acid sequences of wild type PvKNOX proteins are shown together with the *Arabidopsis thaliana* KNAT1 (AtKNAT1) protein sequence. Names of *Primula* proteins reflect similarity to *A. thaliana* KNAT and STM proteins. The standard single letter amino acid code is used. The sequences were used to generate the phylogenetic tree (Fig. 6b) and protein sequence alignments (Fig. S2).

|         |                                                               |    |
|---------|---------------------------------------------------------------|----|
| AtKNAT1 | -----MEEYQHDN-----S-----TTPQRVSFYLYSP                         | 21 |
| PvKNL1  | -----MEDYNNEN-----TSQSGNFLYGG                                 | 18 |
| PvKNL2  | -----                                                         | 0  |
| PvKNL6  | -----                                                         | 0  |
| PvSTL1  | -----                                                         | 0  |
| PvSTL2  | -----                                                         | 0  |
| PvKNL3  | MDMQEMAGLHQHYSDQQLSDTSSVLRISITVDGSTDDQQNPH----HQQQQGGPTWLNISA | 55 |
| PvKNL4  | -----MAFH---HTQELPLHHFSDSSGGPPPTWLNSE                         | 30 |
| PvKNL7  | -----                                                         | 0  |

|         |                                                           |    |
|---------|-----------------------------------------------------------|----|
| AtKNAT1 | ISSSNKNDNTSDTNNNNNNSSNYGPGYNNTNNNNHHQHMLFPHMSSLLPQTTECNFR | 81 |
| PvKNL1  | SLLATATNNNTTST----NTTSSLYGRN-----SSHQSHMMNNMNMNMMS-NINSFH | 65 |
| PvKNL2  | -----MDDIYRQVYMSPDNLMMPVQYQALYS                           | 26 |
| PvKNL6  | -----MDELYR                                               | 6  |
| PvSTL1  | -----MSLMNFGENLNSGG---ANEMMILPNSSS--SNNNTLFLQ             | 35 |
| PvSTL2  | -----MYANNSSSCSMAFGEHLNSGG---IYPMTMPNSSP--SNN-NTLFE       | 41 |
| PvKNL3  | ILQTNFLNLQT-----NSESPSTRPHHQGHNN-----SNAGQWTPR----SMD     | 95 |
| PvKNL4  | ILRQNHYYGGT-----GG---R---SFL                              | 46 |
| PvKNL7  | -----MQ                                                   | 2  |

|         |                                                            |     |
|---------|------------------------------------------------------------|-----|
| AtKNAT1 | SDHDQPNNNNPNVSKSEASSSRIN-HYSMLMRAIH--NTQEANNNDNVSDVEAMKAK  | 137 |
| PvKNL1  | Q-----LGEYPIVKSEAGSGTSQNFIFPNSVIR---GIQTGLSNESCSNNDVESIKAK | 116 |
| PvKNL2  | SSS-----ASVASGGDQSRFPFYGSDELISISDQALIRRSTNIHEDDDVLKRR      | 75  |
| PvKNL6  | L-----HSSISSDDLIT-INRLNGN-----IQF---DTIIVREMSDLKMAQ        | 43  |
| PvSTL1  | QNHNNFN-----TSNQNNITPFLLENYN--NNQLNV--YSTDHQGASSLRK        | 78  |
| PvSTL2  | NNHTSE-----NQTSFFMENNQ---NINSNDDHGGSTASSISLRK              | 80  |
| PvKNL3  | TNNNNNNNNN-----NNNNNNN-----NESVVEDPGGMSWQTARHKAE           | 136 |
| PvKNL4  | QTINNNNNNN-----SENDEFS-----RRSESDGSGEEREWQTAKCKSD          | 87  |
| PvKNL7  | -----EQGGNM-----GMMGGDHFSGDVGGMKAE                         | 29  |

Helix Loop Helix

|         |                                                                       |     |
|---------|-----------------------------------------------------------------------|-----|
| AtKNAT1 | <b>IIAHPHYSTLLQAYLDCQKIGAPPDVRITAAARQDFE</b> ARQQR-STP---SVSASSRDP    | 192 |
| PvKNL1  | <b>IIISHPQYSNLLLEAYMDCQKVGAPPEVAAQLTAVREEFE</b> GRQRA-STI---G-KNATKDP | 170 |
| PvKNL2  | <b>IASHPWPYKLLDAYIGCQKVGAPPEISCLLEETQREND</b> VLNH---KA---ASSCLGEDP   | 128 |
| PvKNL6  | <b>IASHPLYPNLVSAYIECRKVGAPPEMALLLEISKENI</b> PIS-----TCGEIGVDP        | 93  |
| PvSTL1  | <b>IIAHPHYHRLLAAYVNCQKIGAPPEVVAGLEEAAYSVA</b> VRG---RV---DSSRVGEDP    | 130 |
| PvSTL2  | <b>IMAHPHYRLLAAYVNCQKIGAPQEVVARLEEAYQVM-</b> IG---RV---GPGCVGDDP      | 130 |
| PvKNL3  | <b>ILAHPLYEQLLSAHVAQLRIATPVDQLPRIDAQLAQSQ</b> QVVAKYSGMAHGGISMG--DDK  | 194 |
| PvKNL4  | <b>ILSHPLYEQLLSAHVQCLRATPVDQLPRIDAQLAQSQ</b> QVVAKYSVLGHGNPPL---DDK   | 144 |
| PvKNL7  | <b>IAAHPLCEQLLAHVAQLRVATPIDQLPMTIEAQLAQSQ</b> GIVRAYAASVQGNRPLSPHERQ  | 89  |

\* : \*\*      \* : \* : \*      \* : \* : \*      \* : \* : \*

Amphipathic Helix H3

|         |                                                                       |     |
|---------|-----------------------------------------------------------------------|-----|
| AtKNAT1 | <b>ELDQFMAYCDMLVKYREELTRPIQ</b> ---EAMEFIRRIESQLSMLCQ---SPIHILNN      | 243 |
| PvKNL1  | <b>ELDQFMAYYNMLVKYREELTRPIQ</b> ---EAMDFMRRVEAQLNILLNNNNSTAPVRFNS     | 226 |
| PvKNL2  | <b>ELDEFMNTFCEILLKYKSDLSKPLE</b> ---EATTFLNKIELQFGNLCCKDEGPVSS-----   | 178 |
| PvKNL6  | <b>ELDDFMGTYCAVLQRKYKEDLTKFPFN</b> ---EATTFLTLSIESQLHDLCKDTIITPTTSLAS | 149 |
| PvSTL1  | <b>GLDQFMAYCEMLTKYEQELSKPFFK</b> ---EAMLFLSKIESQFKALALPS-SDS-----     | 178 |
| PvSTL2  | <b>GLDQFMAYCEMLNKYEQELSKPFFK</b> ---EAMLFLSKFESQFRALTLSSSTGHS-----    | 179 |
| PvKNL3  | <b>ELDQFMTHYVLLLSCFKQQLQHVVRVHAMEAVMACWELEQSLQSL</b> TGVSPEGETGATMSD  | 254 |
| PvKNL4  | <b>DLQFMTHYVLLLSFKQQLQHVVRVHAMEAVMACWELEQSLQSL</b> TGVAPGEGTGATMSD    | 204 |
| PvKNL7  | <b>ELDNFLGQYIMVLSFFKDLQHVVRVHAMEAVMACREIHNQLAL</b> TGVTLGEGSGATMSD    | 149 |

\* : \* :      :      \* : \* : \*      \* : \* : \*      \* : \* : \*

ELK Domain

|         |                                                                     |     |
|---------|---------------------------------------------------------------------|-----|
| AtKNAT1 | PDGK-----S---DNMGSSDEEQENNSGGETEELP---EIDPRAED <b>RELKNHLLRKY</b>   | 288 |
| PvKNL1  | EE-K-----C---EGVV-SSEEDQENSGETELA---EIDPRAED <b>QELKNYLLRKY</b>     | 269 |
| PvKNL2  | -----DDDLGGGEVEGL---DNRTQSE <b>KDLKDRLLRKF</b>                      | 209 |
| PvKNL6  | -----DDMAGSSEE---EMSCGEVEAVESQESSVPRKGD <b>KELKEMLLRKY</b>          | 191 |
| PvSTL1  | ---G-----F---DGYGSSEEE---AEFIHN---TVDPQAE <b>ENELKGQLLRKY</b>       | 214 |
| PvSTL2  | ---G-----F---ERNGSSEE---ADTDYS---IVDRQED <b>KDLKGRLLRKY</b>         | 215 |
| PvKNL3  | DEEDQLESMDNLF-----DGSLDGHDSTGFGLVPTES-ERSLMERVR <b>QELKHELKQGY</b>  | 307 |
| PvKNL4  | DEEDQADSDTNIY-----DGSLDGTDNMGFG--MPTES-ERSLMARVR <b>QELKLELKQGY</b> | 255 |
| PvKNL7  | DEADDTNNIMQMDFSMDHQASAEGHDMMGFGPLPTES-ERTLMERVR <b>QELKTELKQGF</b>  | 208 |

. : \* \*      \* : :

ELK Domain

Homeodomain

|         |                                                                      |     |
|---------|----------------------------------------------------------------------|-----|
| AtKNAT1 | <b>SGYLSLKLQELS</b> KKKKKGKLPKEARQKLLTWELHYKWPYPSESEKVALAESTGLDQKQI  | 348 |
| PvKNL1  | <b>SGYLGLKQELS</b> KKKKKGKLPKIDARQKLLSWELHYKWPYPSESEKVALAESTGLDQKQI  | 329 |
| PvKNL2  | <b>GSHISNLKLEFS</b> KKKKKGKLPKEGRQTLLEWNLHYKWPYPTEGDKI SLAETTGLDQKQI | 269 |
| PvKNL6  | <b>SGYLSLRLKDFL</b> KKKKKGKLPNDARTALLDWNTHYRWYPTEEEKVKLSEVTGLDQKQI   | 251 |
| PvSTL1  | <b>SGYLGLKQEFM</b> KKKKKGKLPKEARNQLLEWWSRNYKWPYPSESQKMALAESTGLDQKQI  | 274 |
| PvSTL2  | <b>SGYLGLKQEFM</b> KKKKKGKLPKEARENLEWWSRNYKWPYPSESQKMELEAESTGLDPKQI  | 275 |
| PvKNL3  | <b>KEKIVDIREIIL</b> RKRRAGKLPDGTTSVLKAWWQSHSKWPYPTEEDKARLVQEPGLKQI   | 367 |
| PvKNL4  | <b>KEKIVDIREIIL</b> RKRRAGKLPDGTTSVLKAWWQSHSKWPYPTEEDKARLVQETGLQKQI  | 315 |
| PvKNL7  | <b>RSRIEDVREIIL</b> RKRRAGKLPDGTTSVLKNWQLHAKWPYPTEEDKAKLVEETGLQKQI   | 268 |

: . : :      : \* : \* \* \*      \*      \* \* .      : \* \* \* \* \*      \* : \* : \*      \* : \* \* \*      \* : \* \* \*

Homeodomain

|         |                                                                     |     |
|---------|---------------------------------------------------------------------|-----|
| AtKNAT1 | <b>NNWFINQRKRHWKPS</b> EDMQFMVMDGLQHPHAA---LYMDGHYMGDGPYRLGP-----   | 398 |
| PvKNL1  | <b>NNWFINQRKRHWKPS</b> EDMQFMVMDGI-HPQSAS---LYMDGHYMGEGPYRLGP-----  | 378 |
| PvKNL2  | <b>NNWFINQRKRHWKPS</b> ENMQLAVMDNLTGQFYAEDD-----                    | 304 |
| PvKNL6  | <b>NNWFINQRKRHWKPS</b> EDMRFALMEGVSGNSNTGSS-MYVDHGD-GTGSNLVKGQLPRFI | 308 |
| PvSTL1  | <b>NNWFINQRKRHWKPS</b> EDMQFVVMDSNSHPHNSAAAHHYMDHVLANPFPMDTSPSFI--- | 330 |
| PvSTL2  | <b>NNWFINQRKRHWKPT</b> DEMDFVMDPNSPN-AAAHHYMDHVMVNPFPMDI-----       | 325 |
| PvKNL3  | <b>NNWFINQRKRHWHSNP</b> STSTILKSKRSSSGDKNRDQFA-----                 | 406 |
| PvKNL4  | <b>NNWFINQRKRHWHSN</b> PSSSTVVKSKRKSAGEPSNERFM-----                 | 354 |
| PvKNL7  | <b>NNWFINQRKRHWHSN</b> SQSVTALKSKRKR-----                           | 296 |

\*\*\*\*\* : \* : .

**Fig. S2** Multiple sequence alignment of PvKNOX proteins. Clustal Omega multiple sequence alignment of the eight predicted wild type PvKNOX proteins, and *Arabidopsis thaliana* KNAT1 (AtKNAT1) is shown. The standard single letter amino acid code is used. Amino acid sequence numbers for each line are indicated at right. The final number in brackets indicates the full length amino acid sequence of each protein. The Helix Loop Helix domain is indicated in red, the Amphipathic Helix H3 in blue, the ELK domain in green, and the Homeodomain in orange. (-), alignment gaps. (\*), fully conserved residues; (:), strongly similar property residues; (.), weakly similar property residues.

**Table S1** RNA-Seq read data from six paired-end read libraries

| <b>Sample</b>               | <b>Paired-end reads</b> | <b>Total no. of bases</b> | <b>Transcript assemblies</b> |
|-----------------------------|-------------------------|---------------------------|------------------------------|
| <i>Oakleaf</i> open flowers | 24,995,179              | $5.0 \times 10^9$         | 33,197                       |
| wild type open flowers      | 33,400,153              | $6.7 \times 10^9$         | 35,809                       |
| <i>Oakleaf</i> young leaves | 14,310,589              | $2.9 \times 10^9$         | 27,457                       |
| wild type young leaves      | 45,723,021              | $9.1 \times 10^9$         | 33,711                       |
| Mixed stage pin flowers     | 100,768,798             | $2.0 \times 10^{10}$      | 39,688                       |
| Mixed stage thrum flowers   | 81,045,610              | $1.6 \times 10^{10}$      | 41,488                       |

The number of paired-end sequence reads, the total number of bases and the number of transcript assemblies obtained from each of the six tissue samples are shown, sequences <200 bp have not been included in the transcript assembly numbers.

**Table S2** Differential gene expression of *PvKNOX* genes

| <i>Primula vulgaris</i> gene | <i>Arabidopsis thaliana</i> gene | <i>Knox gene</i> Class | Normalised read counts |           |                |           | Log <sub>2</sub> fold change |        |
|------------------------------|----------------------------------|------------------------|------------------------|-----------|----------------|-----------|------------------------------|--------|
|                              |                                  |                        | Leaf                   |           | Flower         |           | leaf                         | flower |
|                              |                                  |                        | <i>Oakleaf</i>         | wild type | <i>Oakleaf</i> | wild type |                              |        |
| <i>PvKNL1</i>                | <i>KNAT1</i>                     | I                      | 0                      | 1         | 307            | 194       | –                            | 0.66   |
| <i>PvKNL2</i>                | <i>KNAT2</i>                     | I                      | 27                     | 73        | 232            | 135       | -1.45                        | 0.78   |
| <i>PvKNL6</i>                | <i>KNAT6</i>                     | I                      | 15                     | 7         | 1502           | 1077      | 0.96                         | 0.48   |
| <i>PvSTL1</i>                | <i>STM1</i>                      | I                      | 2                      | 0         | 135            | 79        | –                            | 0.77   |
| <i>PvSTL2</i>                | <i>STM1</i>                      | I                      | 0                      | 0         | 558            | 255       | –                            | 1.13   |
| <i>PvKNL3</i>                | <i>KNAT3</i>                     | II                     | 1971                   | 1591      | 1704           | 1424      | 0.31                         | 0.26   |
| <i>PvKNL4</i>                | <i>KNAT4</i>                     | II                     | 1716                   | 3368      | 1232           | 2595      | -0.97                        | -1.07  |
| <i>PvKNL7</i>                | <i>KNAT5</i>                     | II                     | 2690                   | 672       | 1690           | 3056      | 2.00                         | -0.85  |

The eight *P. vulgaris* *KNOX* genes, identified from gene models based on assembled *P. vulgaris* genome sequence data and RNA-Seq transcript assemblies, were named according to the similarity of their encoded proteins to *Arabidopsis* *KNOX* proteins. *Primula vulgaris* genes are shown alongside the corresponding *A. thaliana* gene and its unigene identifier (ID). RNA-Seq normalized read counts from leaf and flower tissues of *Oakleaf* and wild type plants are shown; the log<sub>2</sub> fold change in expression between the leaf samples and flower samples is shown. The wild type was a pin plant.

**Table S3** Analysis of single nucleotide polymorphisms in *PvKNL* genes

| Gene   | Position in genomic DNA | Base Change      | Amino acid change | Reads for <i>Oak</i> SNP in flower | Total reads at this position | Reads for <i>Oak</i> SNP in leaf | Total reads at this position | Genotype and Impact of SNP on encoded protein |
|--------|-------------------------|------------------|-------------------|------------------------------------|------------------------------|----------------------------------|------------------------------|-----------------------------------------------|
| PvKNL1 | 671                     | TCT - ACT        | Ser35 - Thr       | 7                                  | 7                            | 0                                | 0                            | Homozygous                                    |
| PvKNL1 | 1882                    | ACG - ATG        | Thr161 - Met      | 3                                  | 3                            | 0                                | 0                            | Homozygous                                    |
| PvKNL2 | 3534                    | GCT - GGT        | Ala120 - Gly      | 3                                  | 3                            | No SNP                           | No SNP                       | Homozygous                                    |
| PvKNL2 | 25367                   | GGG - GCG        | Gly233 - Ala      | 9                                  | 10                           | No SNP                           | No SNP                       | Also found in pin                             |
| PvKNL2 | 30146                   | CAG - TAG        | Gln298 - Stop     | 2                                  | 15                           | No SNP                           | No SNP                       | Truncated protein                             |
| PvSTL1 | 8202                    | Frameshift -2 bp | aa12: stop16      | 3                                  | 8                            | No SNP                           | No SNP                       | Truncated protein                             |
| PvSTL1 | 8188                    | GAA - GCA        | Glu17 - Ala       | 8                                  | 15                           | 2                                | 2                            | Substitution tolerated                        |
| PvSTL1 | 8068                    | Frameshift +2 bp | aa57: stop63      | 4                                  | 11                           | No SNP                           | No SNP                       | Truncated protein                             |
| PvSTL1 | 2413                    | TCG - CCG        | Ser271 - Pro      | 5                                  | 10                           | No SNP                           | No SNP                       | Substitution tolerated                        |
| PvSTL1 | 2278                    | GTC - ATC        | Val316 - Ile      | 8                                  | 13                           | No SNP                           | No SNP                       | Substitution tolerated                        |
| PvSTL2 | 7432                    | GAA - CAA        | Glu47 - Gln       | 37                                 | 37                           | 0                                | 0                            | Homozygous and in Pin                         |
| PvSTL2 | 7336                    | GCG - ACG        | Ala79 - Thr       | 29                                 | 29                           | 0                                | 0                            | Homozygous and in Pin                         |
| PvSTL2 | 3225                    | ATT - ATG        | Ile197 - Met      | 31                                 | 31                           | 0                                | 0                            | Homozygous and in Pin                         |
| PvKNL3 | 7545                    | CAG - CAT        | Gln65 - His       | 67                                 | 98                           | 50                               | 63                           | Substitution tolerated                        |
| PvKNL3 | 2860                    | TTG - TCG        | Leu335 - Ser      | No SNP                             | No SNP                       | 2                                | 15                           | Substitution not tolerated                    |
| PvKNL3 | 2034                    | AGT - AGA        | Ser395 - Arg      | No SNP                             | No SNP                       | 2                                | 11                           | Also found in pin                             |
| PvKNL4 | 2083                    | AAC - AGC        | Asn28 - Ser       | 17                                 | 69                           | 23                               | 66                           | Substitution tolerated                        |
| PvKNL7 | 8564                    | GGG - GAG        | Gly6 - Glu        | 0                                  | 0                            | 66                               | 132                          | Substitution not tolerated                    |

Single nucleotide polymorphisms (SNPs) detected in *PvKNL* genes, as compared with the wild type draft genome sequence. The position of each polymorphism in the genomic DNA is indicated. The resulting codon and amino acid (aa) changes are also shown. For frameshifts, the aa at which the peptide sequence diverges from wild type is shown, as is the next stop codon in the shifted reading frame. The Illumina read counts with the *Oakleaf* SNP variant, are shown for flower and leaf transcriptomes. The total number of reads at this position (*Oakleaf* and wild type) are also shown. Where no SNP was detected in either flower or leaf RNA-Seq data this is indicated as 'No SNP'. The final column indicates whether the *Oakleaf* SNP as compared with the wild type draft genome is homozygous or heterozygous in *Oakleaf*. Where the same *Oakleaf* SNP was also found in the wild type pin plant transcriptome data this is also indicated. Where the SNP is heterozygous, the impact of the SNP on the encoded protein as determined by SIFT (Ng & Henikoff, 2003) (<http://sift.bii.a-star.edu.sg/>) is shown.

## Reference

Ng PC, Henikoff S. 2003. SIFT: predicting amino acid changes that affect protein function. *Nucleic Acids Research* **31**: 2812–3814.
